# Supplementary material
Source: PubMed Central journal article supplement (PMC10247386)
Supplement: NIHMS1861711-supplement-1.pdf [file NIHMS1861711-supplement-1.pdf]

**Table S1. Average Tablet Module Scores for Healthy Controls and Patient Diagnostic Group**

| <b>Tablet Module</b> | <b>Tablet Activity</b>                                                                                                                                                                                           | <b>Healthy Controls Mean(SD) N=29</b> | <b>Left Stroke Mean(SD) N=16</b> | <b>Right Stroke Mean(SD) N=3</b> | <b>PPA Mean(SD) N=10</b> | <b>MCI Mean(SD) N=28</b> | <b>Alzheimer's Dementia Mean(SD) N=7</b> | <b>Parkinsonian Disorder* Mean(SD) N=13</b> |
|----------------------|------------------------------------------------------------------------------------------------------------------------------------------------------------------------------------------------------------------|---------------------------------------|----------------------------------|----------------------------------|--------------------------|--------------------------|------------------------------------------|---------------------------------------------|
| Hungry Bees          | Digit Span Forward                                                                                                                                                                                               | 6.3(1.3)                              | 4.0(2.1)                         | 5(2.7)                           | 4.7(2.6)                 | 6.2(1.8)                 | 5.5(1.4)                                 | 5.17(1.6)                                   |
| Hungry Bees          | Digit Span Backward                                                                                                                                                                                              | 4.9(1.5)                              | 2.4(1.8)                         | 2.3(2.1)                         | 2.6(2.0)                 | 4.7(2.1)                 | 4(2.2)                                   | 4(2.6)                                      |
| Follow The Glow      | Spatial Span Forward                                                                                                                                                                                             | 5.6(0.9)                              | 4.3(1.4)                         | 3.5(0.7)                         | 4.6(1.1)                 | 5.7(0.8)                 | 4.5(2.7)                                 | 4.5(1.8)                                    |
| Follow The Glow      | Spatial Span Backward                                                                                                                                                                                            | 5.7(1.8)                              | 3.4(1.5)                         | 3.0(0)                           | 4.0(1.2)                 | 4.7(1.0)                 | 3.8(1.9)                                 | 4.3(2.4)                                    |
| Lucky Letters        | Letter Fluency                                                                                                                                                                                                   | 16.6(4.2)                             | 6.7(6.2)                         | 7(7.6)                           | 8.5(6.3)                 | 16.2(8.9)                | 15.7(8.6)                                | 12.5(9.6)                                   |
| Riff on This!        | Category Fluency                                                                                                                                                                                                 | 13.9(6.5)                             | 7.5(6.1)                         | 6.3(3.2)                         | 2.8(2.1)                 | 12.6(8.7)                | 8.8(5.1)                                 | 11.1(8.9))                                  |
| Bolt Bot             | Trails A                                                                                                                                                                                                         | 7.6(2.2)                              | 29.0(12.1)                       | 33.9(12.8)                       | 37.3(25.0)               | 18.8(4.2)                | 23.5(6.6)                                | 29.4(15.5)                                  |
| Bolt Bot             | Trails B                                                                                                                                                                                                         | 35.3(8.7)                             | 106.7(19.3)                      | 105.8(91.5)                      | 104.7(20.6)              | 91.9(26.8)               | 110.5(23.4)                              | 102.4(21.9)                                 |
| Treasure Tomb        | Coding                                                                                                                                                                                                           | 36.5(11.9)                            | 20.3(9.5)                        | 9.7(10.3)                        | 14.6(14.0)               | 32.8(15.6)               | 18.7(11.1)                               | 22.9(14.5)                                  |
| Chart a Course       | Design Fluency                                                                                                                                                                                                   | 13.4(4.1)                             | 9.4(4.2)                         | 6.3(4.7)                         | 8.4(5.9)                 | 12.5(4.3)                | 9(5.3)                                   | 11.2(3.1)                                   |
| Take Flight          | Tapping: Right Hand                                                                                                                                                                                              | 67.4(13.3)                            | 47.9(23.6)                       | 57.6(24.0)                       | 53.8(20.6)               | 68.6(23.0)               | 74.2(23.5)                               | 55.1(21.6)                                  |
| Take Flight          | Tapping: Left Hand                                                                                                                                                                                               | 63.6(12.6)                            | 53.9(21.6)                       | 28.8(25.4)                       | 51.6(13.9)               | 66.6(23.8)               | 70.4(18.0)                               | 58.8(25.0)                                  |
| Spy Games            | Verbal Learning: Immediate                                                                                                                                                                                       | 14.5(12.5)                            | 6.1(4.5)                         | 3.3(2.9)                         | 3.6(3.4)                 | 5.6(3.5)                 | 5.7(3.0)                                 | 8.4(8.1)                                    |
| Spy Games            | Working Memory: Total Correct                                                                                                                                                                                    | 21.3(8.4)                             | 6.0(6.2)                         | 7(9.6)                           | 1.3(1.4)                 | 15.5(10.7)               | 3.8(4.8)                                 | 12.7(11.7)                                  |
| Spy Games            | Working Memory: Total Correct for Unique Stimuli                                                                                                                                                                 | 8.4(1.6)                              | 4.4(2.5)                         | 4.3(2.5)                         | 2.7(1.3)                 | 6.8(2.7)                 | 3.3(1.8)                                 | 5.6(2.7)                                    |
| Spy Games            | Delayed Recall                                                                                                                                                                                                   | 15.7(14.4)                            | 6.4(5.5)                         | 6.5(0.7)                         | 2(1.4)                   | 5.8(4.3)                 | 4.0(1.4)                                 | 10.2(8.7)                                   |
|                      | PPA= Primary Progressive Aphasia; MCI = Mild Cognitive Impairment; Parkinsonian Disorder includes Parkinson's Disease, Progressive Supranuclear Palsy, Corticobasal Syndrome, and Progressive Supranuclear Palsy |                                       |                                  |                                  |                          |                          |                                          |                                             |

**Table S2 Average Pencil-and-Paper Test Scores for Patient Diagnostic Group.**

| <b>Pencil/Paper Test</b>                                                                                                                                                                                                                    | <b>Left Stroke Mean(SD)</b> | <b>Right Stroke Mean(SD)</b> | <b>PPA Mean(SD)</b> | <b>MCI Mean(SD)</b> | <b>Alzheimer's Dementia Mean(SD)</b> | <b>Parkinsonian Disorder Mean(SD)</b> |
|---------------------------------------------------------------------------------------------------------------------------------------------------------------------------------------------------------------------------------------------|-----------------------------|------------------------------|---------------------|---------------------|--------------------------------------|---------------------------------------|
| Digit Span Forward                                                                                                                                                                                                                          | 5.9(3.1)                    | 6.3(1.5)                     | 5.3(2.4)            | 7.1(1.4)            | 6.8(1.3)                             | 8.7(3.0)                              |
| Digit Span Backward                                                                                                                                                                                                                         | 3.1(1.5)                    | 4.3(0.6)                     | 2.7(2.5)            | 4.6(1.3)            | 3.7(1.4)                             | 6.4(3.7)                              |
| Spatial Span                                                                                                                                                                                                                                | 4.9(1.5)                    | 5.0(2.0)                     | 4.9(2.0)            | 5.8(1.3)            | 6(1.8)                               | 6.7(2.9)                              |
| Spatial Span Backward                                                                                                                                                                                                                       | 3.4(1.7)                    | 5.0(1.0)                     | 3.7(2.0)            | 4.9(1.4)            | 2.8(2.0)                             | 5.9(3.0)                              |
| Letter Fluency                                                                                                                                                                                                                              | 6.8(5.0)                    | 9.0(4.6)                     | 5(4.6)              | 15.8(7.3)           | 15.2(4.3)                            | 11.9(9.1)                             |
| Category Fluency                                                                                                                                                                                                                            | 12.2(6.1)                   | 12.3(7.0)                    | 4.2(3.8)            | 19.1(6.9)           | 14.5(7.0)                            | 17.4(7.1)                             |
| Trails A                                                                                                                                                                                                                                    | 64.3(36.9)                  | 62.7(16.3)                   | 75.1(46.8)          | 34.2(12.9)          | 52.3(33.6)                           | 74.2(77.3)                            |
| Trails B                                                                                                                                                                                                                                    | 181.6(108.4)                | 192.3(95.1)                  | 120.4(75.1)         | 82.1(44.9)          | 93.8(35.7)                           | 100.0(75.0)                           |
| Coding                                                                                                                                                                                                                                      | 33.9(15.3)                  | 29(13)                       | 39(22.4)            | 53.3(20.3)          | 40.4(22.3)                           | 48(25.7)                              |
| Design Fluency                                                                                                                                                                                                                              | 8.4(3.5)                    | 5.7(1.6)                     | 9.6(4.4)            | 9.5(3.7)            | 9.2(5.5)                             | 8.3(4.6)                              |
| Tapping – Right Hand                                                                                                                                                                                                                        | 199.4(24.0)                 | 133.5(7.6)                   | --                  | 219.8(52.5)         | 126(56.6)                            | 237.6(79.1)                           |
| Tapping-Left Hand                                                                                                                                                                                                                           | 207.7(59.2)                 | 145.8(61.9)                  | --                  | 205.8(43.4)         | 172.5(17.7)                          | 229.5(46.3)                           |
| Verbal Learning-Immediate (RAVLT)                                                                                                                                                                                                           | 17.5(7.5)                   | 59(n/a)                      | 16.1(12.5)          | 36.5(12.7)          | 32.6(15.7)                           | 18(n/a)                               |
| Verbal Learning-Immediate (HVLTL)                                                                                                                                                                                                           | 21.2(5.5)                   | 19.5(3.5)                    | 6(n/a)              | 23.2(4.6)           | 7(n/a)                               | 23.5(8.0)                             |
| RAVLT Delayed Recall                                                                                                                                                                                                                        | 1.17(1.6)                   | 19(n/a)                      | 1.1(1.3)            | 6.3(3.9)            | 4.2(4.6)                             | 0(n/a)                                |
| HVLTL Delayed Recall                                                                                                                                                                                                                        | 6.5(4.8)                    | 5.5(5/0)                     | 0(n/a)              | 6.6(3.1)            | 0(n/a)                               | 7.3(4.4)                              |
| -- = no participants performed this subtest from this diagnostic group; n/a = not applicable as only 1 participant participated in this task from this diagnostic group; PPA= Primary Progressive Aphasia; MCI = Mild Cognitive Impairment. |                             |                              |                     |                     |                                      |                                       |
